# Supplementary material for: Food Insecurity and Maternal Diet Influence Human Milk Composition between the Infant’s Birth and 6 Months after Birth in Central-Africa
Source: MDPI journal article supplement (doi:10.3390/nu14194015), 2022-09-27
Supplement: s1 [file s1]

**Table S1- Questionnaires : 24-hour recall and food consumption questionnaire**

**24-HOUR RECALL (Mother)**

Date of recall : /\_\_\_/\_\_\_/ 20\_\_ Previous day : 1.Week day 2.Weekend day or public holiday /\_\_\_/ Interviewer number: /\_\_\_/

Food consumption : Yesterday, what did you eat ?

1) Meal : \_\_\_\_\_ /\_\_\_/\_\_\_/ Sauce : \_\_\_\_\_ /\_\_\_/\_\_\_/

Composition : \_\_\_\_\_

\_\_\_\_\_ At which moment of the day did you consume this dish? 1. Morning 2. Lunch 3. Evening 4. Afternoon 5. Mid-morning 6. Other. Please specify? \_\_\_\_\_

Where was this dish prepared? 1.At home 2. In the street 3. At the eatery 4.At the restaurant 5. Other. Please specify? \_\_\_\_\_

When was this dish prepared ? 1. On the same day 2. The previous day 3. The previous week 4. Does not remember

2) Meal : \_\_\_\_\_ /\_\_\_/\_\_\_/ Sauce : \_\_\_\_\_ /\_\_\_/\_\_\_/

Composition : \_\_\_\_\_

\_\_\_\_\_ At which moment of the day did you consume this dish? 1.Morning 2.Lunch 3.Evening 4. Afternoon 5. Mid-morning 6. Other. Please specify? \_\_\_\_\_

Where was this dish prepared? 1.At home 2. In the street 3. At the eatery 4.At the restaurant 5. Other. Please specify? \_\_\_\_\_

When was this dish prepared ? 1. On the same day 2. The previous day 3. The previous week 4. Does not remember

3) Meal : \_\_\_\_\_ /\_\_\_/\_\_\_/ Sauce : \_\_\_\_\_ /\_\_\_/\_\_\_/

Composition : \_\_\_\_\_

\_\_\_\_\_ At which moment of the day did you consume this dish? 1.Morning 2.Lunch 3.Evening 4. Afternoon 5. Mid-morning 6. Other. Please specify? \_\_\_\_\_

Where was this dish prepared? 1.At home 2. In the street 3. At the eatery 4. At the restaurant 5. Other. Please specify? \_\_\_\_\_

When was this dish prepared ? 1. On the same day 2. The previous day 3. The previous week 4. Does not remember

4) Meal : \_\_\_\_\_ /\_\_\_/\_\_\_/ Sauce : \_\_\_\_\_ /\_\_\_/\_\_\_/

Composition : \_\_\_\_\_

\_\_\_\_\_ At which moment of the day did you consume this dish? 1.Morning 2.Lunch 3.Evening 4. Afternoon 5. Mid-morning 6. Other. Please specify? \_\_\_\_\_

Where was this dish prepared? 1.At home 2. In the street 3. At the eatery 4.At the restaurant 5. Other. Please specify? \_\_\_\_\_

When was this dish prepared ? 1. On the same day 2. The previous day 3. The previous week 4. Does not remember

Snacks consumption: Yesterday, which snacks did you eat?

5) \_\_\_\_\_ / \_/\_/\_/\_/ (detail) : \_\_\_\_\_ Composition : \_\_\_\_\_

6) \_\_\_\_\_ / \_/\_/\_/\_/ (detail) : \_\_\_\_\_ Composition : \_\_\_\_\_

7) \_\_\_\_\_ / \_/\_/\_/\_/ (detail) : \_\_\_\_\_ Composition : \_\_\_\_\_

8) \_\_\_\_\_ / \_/\_/\_/\_/ (detail) : \_\_\_\_\_ Composition: \_\_\_\_\_

Beverage consumption: Yesterday, which beverages did you drink?

9) \_\_\_\_\_ / \_/\_/\_/\_/ (detail) : \_\_\_\_\_ Composition : \_\_\_\_\_

10) \_\_\_\_\_ / \_/\_/\_/\_/ (detail) : \_\_\_\_\_ Composition : \_\_\_\_\_

11) \_\_\_\_\_ / \_/\_/\_/\_/ (detail) : \_\_\_\_\_ Composition : \_\_\_\_\_

12) \_\_\_\_\_ / \_/\_/\_/\_/ (detail) : \_\_\_\_\_ Composition : \_\_\_\_\_

Fruit consumption: Yesterday, which fruits did you consume?

13) \_\_\_\_\_ 14) \_\_\_\_\_

15) \_\_\_\_\_ 16) \_\_\_\_\_

17) \_\_\_\_\_ 18) \_\_\_\_\_

Was your food and beverage consumption yesterday “unusual” ? 1.yes 2.no / \_/\_/

If yes, was your food and beverage consumption : 1.Higher than usual (wedding, ...) 2.Smaller than usual (traveling,...) / \_/\_/

#### HOUSEHOLD FOOD INSECURITY ACCESS SCALE

*For Each of the questions, consider what happened in the PAST 30*

*Please answer if it happened:*

**DAYS**

- NEVER,

- RARELY (once or twice in the past 30 days),

- SOMETIMES (three to ten times in the past 30 days),

- OFTEN (almost every day, more than ten times in the past 30 days).

In the past 30 days, did you WORRY that your household would not have enough food?

In the past 30 days, were you or any household member not able to eat the KINDS OF FOODS YOU PREFERRED because of a lack of resources??

In the past 30 days, did you or any household member have to eat a LIMITED VARIETY OF FOODS due to a lack of resources?

In the past 30 days, did you or any household member have to eat SOME FOODS THAT YOU REALLY DID NOT WANT TO EAT because of a lack of resources to obtain other types of food??

In the past 30 days, did you or any household member have to eat a SMALLER MEAL than you felt you needed because there was not enough food??

In the past 30 days, did you or any household member have to eat FEWER meals in a day because there was not enough food??

In the past 30 days, was there ever NO FOOD TO EAT of any kind in your household because of lack of resources to get food?

In the past 30 days, did you or any household member go to sleep at night HUNGRY because there was not enough food?

In the past 30 days, did you or any household member go A WHOLE DAY AND NIGHT WITHOUT EATING anything because there was not enough food??

#### FOOD CONSUMPTION OF THE MOTHER

Was your food and beverage consumption yesterday unusual compared to the rest of the week ? (Celebration, ceremony, or on the opposite a missed meal ?)

**Yesterday, was your food and beverage consumption ger or smaller than usual?**

Larger

The same

Smaller

**Watch out ! Please write down all food and beverages consumed on the questionnaire provided for this purpose. Remember to describe the meals!**

Did you eat yesterday morning?

Did you eat yesterday at lunch?

Did you eat yesterday evening?

Did you eat anything else during the day in the morning or in the afternoon outside of these meals?

Number of meals consumed during the previous day?

Number of meals during any normal given day?

**ALL MEALS consumed by the MOTHER on the PREVIOUS DAY**

|                                                |                                                                                                                                     |
|------------------------------------------------|-------------------------------------------------------------------------------------------------------------------------------------|
| Cereals                                        | Millet, sorghum, fonio, rice, corn, wheat... including bread, pasta, couscous, dough-nuts, flour....                                |
| Orange-flesh sweet potato                      |                                                                                                                                     |
| Roots and tubers                               | Cassava, yam, white/pale yellow fleshed sweet potato, taro root, fabirama (pesa), po-tatoes                                         |
| Pulses                                         | Beans, Bambara groundnut, sweet pea, lentil, dried pulses, soybean, etc.                                                            |
| Peanut, groundnut                              | To eat, or in a sauce                                                                                                               |
| Sesame seed                                    | Ground, as seeds in a sauce, on pancakes                                                                                            |
| Nuts and seeds                                 | Cashew, wild nuts, other nuts and seeds rich in oil (EXCPET for cola nuts to chew)                                                  |
| Dark green leafy vegetables                    | Sorrel and hibiscus leaves, spinach, sweet potato leaves, moringa and peanut leaves, baobab greens, onion leaves, bean leaves, etc. |
| Dark orange- and red-flesh vegetables          | Pumpkin, carrots, red pepper                                                                                                        |
| Tomato concentrate                             |                                                                                                                                     |
| Other vegetables                               | Tomato, okra, zucchini, eggplant, onion, cabbage, cucumber, salad, etc.                                                             |
| Vitamin A rich fruits                          | Mango, red or dark-orange fleshed papaya, dark (orange fleshed melon, African locust bean (including juices)                        |
| Other fruits                                   | Banana, pineapple, tamarind, monkey's bread, grapes, watermelon, wild fruits... (in-cluding fresh fruit juice).                     |
| Liver                                          | Beef, veal, sheep, poultry...                                                                                                       |
| Meat and other offals                          | In sticks, stews (beef, sheep, chicken and poultry, goat, pork, dog, etc) including offals apart from liver                         |
| Meat, poultry, offals as condiments            | In a sauce or in a soup                                                                                                             |
| Insects, small rodents and other small animals |                                                                                                                                     |
| Fish powder, dried, salted or smoked           | Or ground dried fish used as condiment in a sauce                                                                                   |
| Small dried fishes                             |                                                                                                                                     |
| Other fishes and seafood                       | Fresh, or preserved                                                                                                                 |
| Eggs                                           | From chicken, guinea fowl                                                                                                           |
| Milk and milk products                         | Goat, cow, camel milk,... powdered, concentrated, fermented                                                                         |
| Red palm oil                                   | Or red palm fruit/pulp                                                                                                              |
| Other oils and fats                            | Vegetable oils, butter, shea butter, margarine and mayonnaise, fried foods                                                          |
| Cakes and pastries                             |                                                                                                                                     |
| Tea, coffee                                    | Please detail with or without milk and sugar                                                                                        |
| Sugar, honey, jam, candies                     |                                                                                                                                     |
| Sweet beverages                                | Fanta and other soft drinks, modji, ginger juice, tamarind juice, hibiscus juice, mon-key's bread juice, etc.                       |

|                                                                           |                                                                                                                               |
|---------------------------------------------------------------------------|-------------------------------------------------------------------------------------------------------------------------------|
| Alcoholic beverages                                                       | Beer, millet beer, palm wine, spirits,...                                                                                     |
| Condiments                                                                | Salt, potash, pepper, chili, ginger, "datou", African locust bean powder, stock cube, tomato powder, tomato concentrate, etc. |
| Number of snacks and collation consumed by the mother on the previous day |                                                                                                                               |

| Table S2. Maternal diet and food security indexes during follow-up |                 |                    |                 |                                  |                 |                    |                 |                                  |                 |                  |                  |                                  |
|--------------------------------------------------------------------|-----------------|--------------------|-----------------|----------------------------------|-----------------|--------------------|-----------------|----------------------------------|-----------------|------------------|------------------|----------------------------------|
| Maternal diet (food-consumption questionnaire)                     | first week      | non-undernourished | undernouris-    | <i>P</i> value of the difference | 4 weeks         | non-undernourished | undernourished  | <i>P</i> value of the difference | 11 weeks        | non-undernou-    | undernourished   | <i>P</i> value of the difference |
|                                                                    |                 | women              | hed women       |                                  |                 | women              | women           |                                  |                 | rished women     | women            |                                  |
| Grains, white roots and tubers                                     | 41/44 (93.2%)   | 23/26 (88.5%)      | 14/14 (100.0%)  | 0.5                              | 40/40 (100.0%)  | 26/26 (100.0%)     | 12/12 (100.0%)  | 0.9                              | 38/38 (100.0%)  | 25/25 (100.0%)   | 11/11 (100.0%)   | 0.9                              |
| Pulses: beans, peas and lentils                                    | 5/43 (11.6%)    | 4/25 (16.0%)       | 0/14 (0.0%)     | 0.3                              | 4/39 (10.3%)    | 3/26 (11.5%)       | 0/11 (0.0%)     | 0.5                              | 3/38 (7.9%)     | 2/25 (8.0%)      | 1/11 (9.1%)      | 0.9                              |
| Nuts and seeds                                                     | 24/43 (55.8%)   | 13/25 (52.0%)      | 10/14 (71.4%)   | 0.3                              | 26/39 (66. 7%)  | 16/25 (64.0%)      | 8/12 (66.7%)    | 0.9                              | 29/38 (92.3%)   | 19/25 (76.0%)    | 8/11 (72.7%)     | 0.9                              |
| Milk and milk products                                             | 14/42 (33.3%)   | 7/25 (28.0%)       | 5/13 (38.5%)    | 0.7                              | 17/41 (42.5%)   | 15/26 (57.7%)      | 1/12 (8.3%)     | <b>0.01</b>                      | 14/38 (36.8%)   | 10/25 (40.0%)    | 2/11 (18.2%)     | 0.3                              |
| Meat, poultry, and fish                                            | 32/41 (78.1%)   | 18/24 (75.0%)      | 10/13 (76.9%)   | 0.9                              | 36/40 (90.0%)   | 25/26 (96.2%)      | 9/12 (75.0%)    | 0.1                              | 14/38 (76.3%)   | 18/25 (72.0%)    | 9/11 (81.8%)     | 0.7                              |
| Eggs                                                               | 2/42 (4.8%)     | 0/25 (00.0%)       | 1/13 (7.7%)     | 0.3                              | 0               | 0/26 (0.0%)        | 0/12 (0.0%)     | 0.9                              | 0               | 0/25 (0.0%)      | 0/11 (0.0%)      | 0.9                              |
| Dark green leafy vegetables                                        | 16/43 (37.2%)   | 6/25 (24.0%)       | 9/14 (64.3%)    | <b>0.02</b>                      | 18/40 (45.0%)   | 9/26 (34.6%)       | 7/12 (58.3%)    | 0.3                              | 23/38 (60.5%)   | 14/25 (56.0%)    | 8/11 (72.3%)     | 0.5                              |
| Other vitamin A rich fruits and vegetables                         | 15/42 (35.7%)   | 10/25 (40.0%)      | 4/13 (30.8%)    | 0.7                              | 13/40 (32.5%)   | 7/26 (26.9%)       | 5/12 (41.7%)    | 0.5                              | 11/38 (29.0%)   | 8/25 (32.0%)     | 2/11 (18.2%)     | 0.7                              |
| Other vegetables                                                   | 31/43 (72.1%)   | 18/25 (72.0%)      | 10/14 (71.4%)   | 0.9                              | 37/40 (92.5%)   | 24/26 (92.3%)      | 11/12 (91.7%)   | 0.9                              | 34/38 (89.5%)   | 21/25 (84.0%)    | 11/11 (100.0%)   | 0.3                              |
| Other fruits                                                       | 4/42 (9.5%)     | 2/25 (8.0%)        | 2/13 (15.4%)    | 0.6                              | 7/40 (17.5%)    | 4/26 (15.4%)       | 3/12 (25.0%)    | 0.7                              | 3/38 (7.9%)     | 1/25 (4.0%)      | 1/11 (9.1%)      | 0.5                              |
| Insects, small rodents and other small animals                     | 4/42 (9.5%)     | 2/25 (8.0%)        | 2/13 (15.4%)    | 0.6                              | 1/40 (2.5%)     | 1/26 (3.9%)        | 0/12 (0.0%)     | 0.9                              | 7/38 (18.4%)    | 6/25 (24.0%)     | 1/11 (9.1%)      | 0.4                              |
| Red palm oil                                                       | 10/42 (23.8%)   | 6/25 (24.0%)       | 4/13 (30.8%)    | 0.7                              | 11/40 (27.5%)   | 5/26 (19.2%)       | 5/12 (41.7%)    | 0.2                              | 8/38 (21.1%)    | 6/25 (24.0%)     | 1/11 (9.1%)      | 0.4                              |
| Other oils and fats                                                | 36/42 (85.7%)   | 20/25 (80.0%)      | 12/13 (92.3%)   | 0.6                              | 34/40 (85.00%)  | 23/26 (88.5%)      | 9/12 (75.0%)    | 0.4                              | 33/38 (86.8%)   | 22/25 (88.0%)    | 10/11 (90.9%)    | 0.9                              |
| Condiments and seasonings                                          | 37/43 (86.1%)   | 22/25 (88.0%)      | 11/14 (78.6%)   | 0.6                              | 31/40 (77.5%)   | 21/26 (80.8%)      | 8/12 (66.7%)    | 0.4                              | 29/38 (76.3%)   | 19/25 (76.0%)    | 8/11 (72.7%)     | 0.9                              |
| Other beverages and foods                                          | 25/42 (59.5%)   | 10/25 (40.0%)      | 11/13 (84.6%)   | <b>0.02</b>                      | 23/40 (57.5%)   | 10/26 (38.5%)      | 11/12 (91.7%)   | <b>0.004</b>                     | 20/38 (52.6%)   | 9/25 (36.0%)     | 9/11 (81.8%)     | <b>0.03</b>                      |
| Sweet foods                                                        | 35/43 (81.4%)   | 18/25 (72.0%)      | 14/14 (100.0%)  | <b>0.04</b>                      | 35/40 (87.5%)   | 22/26 (84.6%)      | 11/12 (91.7%)   | 0.9                              | 34/38 (89.5%)   | 21/25 (84.0%)    | 11/11 (100.0%)   | 0.3                              |
| Sweet beverages                                                    | 1/43 (2.3%)     | 1/25 (4.0%)        | 0/14 (0.0%)     | 0.9                              | 1/40 (2.5%)     | 1/26 (3.9%)        | 0/12 (0.0%)     | 0.9                              | 0               | 0/25 (0.0%)      | 0/11 (0.0%)      | 0.9                              |
| Woman’s dietary diversity score (WDDS)                             | 4.00(3.0 ; 6.0) | 4.00 (2.0 ; 5.0)   | 5.0 (4.0 ; 6.0) | 0.2                              | 5.0 (4.0 ; 6.0) | 5.0 (4.0 ; 6.0)    | 5.0 (3.5 ; 6.0) | 0.8                              | 5.0 (4.0 ; 6.0) | 5.00 (4.0 ; 6.0) | 5.00 (4.0 ; 6.0) | 0.9                              |
| WDDS categories                                                    |                 |                    |                 | 0.3                              |                 |                    |                 | 0.9                              |                 |                  |                  | 0.7                              |
| Low diverse diet (WDD < 5)                                         | 24/42 (57.1%)   | 16/26 (61.5%)      | 6/14 (42.9%)    |                                  | 16/40 (40.0%)   | 11/26 (42.3%)      | 5/12 (41.7%)    |                                  | 15/38 (39.5%)   | 11/25 (44.0%)    | 4/11 (36.4%)     |                                  |

|                                                |                 |                 |                 |       |                 |                 |                 |       |                 |                 |                  |     |
|------------------------------------------------|-----------------|-----------------|-----------------|-------|-----------------|-----------------|-----------------|-------|-----------------|-----------------|------------------|-----|
| Diverse diet (WDD ≥ 5)                         | 18/42 (42.9%)   | 10/26 (38.5%)   | 8/14 (57.1%)    |       | 24/40 (60.0%)   | 15/26 (57.7%)   | 7/12 (58.3%)    |       | 23/38 (60.5%)   | 14/25 (56.0%)   | 7/11 (63.6%)     |     |
| Maternal diet (24-h recall)                    |                 |                 |                 |       |                 |                 |                 |       |                 |                 |                  |     |
| Grains, white roots and tubers                 | 32/32 (100.0%)  | 19/19 (100.0%)  | 12/12 (100.0%)  | 0.9   | 29/29 (100.0%)  | 20/20 (100.0%)  | 9/9 (100.0%)    | 0.9   | 31/31 (100.0%)  | 20/20 (100.0%)  | 11/11 (100.0%)   | 0.9 |
| Pulses: beans, peas and lentils                | 2/32 (6.3%)     | 2/19 (10.5%)    | 0/12 (0.0%)     | 0.5   | 1/29 (3.5%)     | 1/20 (5.0%)     | 0/9 (0.0%)      | 0.9   | 1/31 (3.2%)     | 0/20 (0.0%)     | 1/11 (9.1%)      | 0.4 |
| Nuts and seeds                                 | 15/32 (46.9%)   | 6/19 (31.6%)    | 8/12 (66.7%)    | 0.1   | 22/29 (75.9%)   | 15/20 (75.0%)   | 7/9 (77.8%)     | 0.9   | 20/31 (64.5%)   | 12/20 (60.0%)   | 8/11 (72.7%)     | 0.7 |
| Milk and milk products                         | 11/32 (34.4%)   | 9/19 (47.4%)    | 1/12 (8.3%)     | 0.046 | 12/29 (41.4%)   | 11/20 (55.0%)   | 1/9 (11.1%)     | 0.04  | 9/31 (29.0%)    | 8/20 (40.0%)    | 1/11 (9.1%)      | 0.1 |
| Meat, poultry, and fish                        | 27/32 (84.4%)   | 17/19 (89.5%)   | 9/12 (75.0%)    | 0.4   | 26/29 (89.7%)   | 20/20 (100.0%)  | 6/9 (66.7%)     | 0.02  | 26/31 (83.9%)   | 16/20 (80.0%)   | 10/11 (90.9%)    | 0.6 |
| Eggs                                           | 0/32 (0.0%)     | 0/19 (0.0%)     | 0/12 (0.0%)     | 0.9   | 0/29 (0.0%)     | 0/20 (0.0%)     | 0/9 (0.0%)      | 0.9   | 0/31 (0.0%)     | 0/20 (0.0%)     | 0/11 (0.0%)      | 0.9 |
| Dark green leafy vegetables                    | 16/32 (50.0%)   | 6/19 (31.6%)    | 10/12 (83.3%)   | 0.009 | 19/29 (65.5%)   | 11/20 (55.00%)  | 8/9 (88.9%)     | 0.1   | 20/31 (64.5%)   | 13/20 (65.0%)   | 7/11 (63.6%)     | 0.9 |
| Other vitamin A rich fruits and vegetables     | 6/32 (18.8%)    | 4/19 (21.1%)    | 1/12 (8.3%)     | 0.6   | 1/29 (3.5%)     | 1/20 (5.00%)    | 0/9 (0.0%)      | 0.9   | 3/31 (9.7%)     | 2/20 (10.0%)    | 1/11 (9.1%)      | 0.9 |
| Other vegetables                               | 30/32 (93.8%)   | 17/19 (89.5%)   | 12/12 (100.0%)  | 0.5   | 26/29 (89.7%)   | 19/20 (95.00%)  | 7/9 (77.8%)     | 0.2   | 28/31 (90.3%)   | 18/20 (90.0%)   | 10/11 (90.9%)    | 0.9 |
| Other fruits                                   | 3/32 (9.4%)     | 1/19 (5.3%)     | 2/12 (16.7%)    | 0.5   | 3/29 (10.3%)    | 3/20 (15.00%)   | 0/9 (0.0%)      | 0.5   | 3/31 (9.7%)     | 1/20 (5.0%)     | 2/11 (18.2%)     | 0.3 |
| Insects, small rodents and other small animals | 3/32 (9.4%)     | 1/19 (5.3%)     | 2/12 (16.7%)    | 0.5   | 3/29 (10.3%)    | 3/20 (15.00%)   | 0/9 (0.0%)      | 0.5   | 5/31 (16.1%)    | 4/20 (20.0%)    | 1/11 (9.1%)      | 0.6 |
| Red palm oil                                   | 10/32 (31.3%)   | 5/19 (26.3%)    | 4/12 (33.3%)    | 0.7   | 13/29 (44.8%)   | 5/20 (25.0%)    | 8/9 (88.9%)     | 0.003 | 7/31 (22.6%)    | 4/20 (20.0%)    | 3/11 (27.3%)     | 0.7 |
| Other oils and fats                            | 31/32 (96.9%)   | 18/19 (94.7%)   | 12/12 (100.0%)  | 0.9   | 29/29 (100.0%)  | 20/20 (100.0%)  | 9/9 (100.0%)    | 0.9   | 28/31 (90.3%)   | 18/20 (90.0%)   | 10/11 (90.9%)    | 0.9 |
| Condiments and seasonings                      | 31/32 (96.9%)   | 18/19 (94.7%)   | 12/12 (100.0%)  | 0.9   | 28/29 (96.6%)   | 20/20 (100.0%)  | 8/9 (88.9%)     | 0.3   | 29/31 (93.6%)   | 18/20 (90.0%)   | 11/11 (100.0%)   | 0.5 |
| Other beverages and foods                      | 1/32 (3.1%)     | 1/19 (5.3%)     | 0/12 (0.0%)     | 0.9   | 2/29 (6.9%)     | 1/20 (5.0%)     | 1/9 (11.1%)     | 0.5   | 2/31 (6.5%)     | 1/20 (5.0%)     | 1/11 (9.1%)      | 0.9 |
| Sweet foods                                    | 13/32 (40.6%)   | 7/19 (36.8%)    | 6/12 (50.0%)    | 0.7   | 11/29 (37.9%)   | 6/20 (30.0%)    | 5/9 (55.6%)     | 0.2   | 12/31 (38.7%)   | 8/20 (40.0%)    | 4/11 (36.4%)     | 0.9 |
| Sweet beverages                                | 12/32 (37.5%)   | 6/19 (31.6%)    | 6/12 (50.0%)    | 0.5   | 13/29 (44.8%)   | 7/20 (35.0%)    | 6/9 (66.7%)     | 0.2   | 11/31 (35.5%)   | 6/20 (30.0%)    | 5/11 (45.5%)     | 0.5 |
| Woman's dietary diversity score (WDDS)         | 5.0 (4.0 ; 5.0) | 4.0 (4.0 ; 5.0) | 5.0 (4.0 ; 5.0) |       | 5.0 (4.0 ; 6.0) | 5.0 (4.0 ; 6.0) | 5.0 (3.0 ; 5.0) |       | 5.0 (3.0 ; 5.0) | 5.0 (3.5 ; 5.0) | 5.00 (3.0 ; 6.0) |     |
| WDDS categories                                |                 |                 |                 |       |                 |                 |                 |       |                 |                 |                  |     |
| Low diverse diet (WDD < 5)                     | 14/32 (43.8%)   | 10/19 (52.6%)   | 4/12 (33.3%)    |       | 11/29 (37.9%)   | 7/20 (35.0%)    | 4/9 (44.4%)     |       | 12/31 (38.7%)   | 8/20 (40.0%)    | 4/11 (36.4%)     |     |
| Diverse diet (WDD ≥ 5)                         | 18/32 (56.3%)   | 9/19 (47.4%)    | 8/12 (66.7%)    |       | 18/29 (62.1%)   | 13/20 (65.0%)   | 5/9 (55.6%)     |       | 19/31 (61.3%)   | 12/20 (60.0%)   | 7/11 (63.6%)     |     |
| Food security during follow-up                 |                 |                 |                 |       |                 |                 |                 |       |                 |                 |                  |     |

|                                                |                  |                  |                   |       |                  |                  |                   |     |                  |                  |                   |     |
|------------------------------------------------|------------------|------------------|-------------------|-------|------------------|------------------|-------------------|-----|------------------|------------------|-------------------|-----|
| Household Food Insecurity Access Scale (HFIAS) | 9.0 (6.0 ; 12.0) | 8.0 (5.0 ; 11.5) | 11.0 (9.0 ; 13.0) | 0.049 | 8.0 (6.0 ; 11.0) | 8.0 (6.0 ; 10.0) | 11.0 (8.0 ; 12.0) | 0.1 | 9.0 (7.0 ; 14.0) | 9.0 (7.0 ; 12.0) | 11.0 (8.0 ; 16.0) | 0.2 |
| Categories of HFIAS                            |                  |                  |                   | 0.5   |                  |                  |                   | 0.4 |                  |                  |                   | 0.5 |
| Food secure                                    | 1/48 (2.1%)      | 1/28 (3.6%)      | 0                 |       | 0                | 0                | 0                 |     | 0                | 0                | 0                 |     |
| Mildly food insecure                           | 0                | 0                | 0                 |       | 1/41 (2.4%)      | 0                | 1/13 (7.7%)       |     | 2/40 (5.0%)      | 2/25 (8.0%)      | 0                 |     |
| Moderately food insecure                       | 22/48 (45.8%)    | 16/28 (57.1%)    | 6/15 (40.0%)      |       | 21/41 (51.2%)    | 14/26 (53.9%)    | 5/13 (38.5%)      |     | 18/40 (45.0%)    | 12/25 (48.0%)    | 5/13 (38.5%)      |     |
| Severely food insecure                         | 25/48 (52.1%)    | 11/28 (39.3%)    | 9/15 (60.0%)      |       | 19/41 (46.3%)    | 12/26 (46.2%)    | 7/13 (53.9%)      |     | 20/40 (50.0%)    | 11/25 (44.0%)    | 8/13 (61.5%)      |     |
| Household hunger scale index (HHS)             | 0.0 (0.0 ; 1.0)  | 0.0 (0.0 ; 1.5)  | 0.0 (0.0 ; 2.0)   | 0.7   | 0.0 (0.0 ; 1.0)  | 0.0 (0.0 ; 1.0)  | 0.0 (0.0 ; 1.0)   | 0.5 | 0.0 (0.0 ; 1.0)  | 0.0 (0.0 ; 1.0)  | 1.0 (0.0 ; 1.0)   | 0.1 |
| Categories of HHS                              |                  |                  |                   | 0.9   |                  |                  |                   | 0.6 |                  |                  |                   | 0.6 |
| Little to no hunger in the household           | 35/46 (76.1%)    | 21/28 (75.0%)    | 11/15 (73.3%)     |       | 36/41 (87.8%)    | 22/26 (84.6%)    | 12/13 (92.3%)     |     | 36/40 (90.0%)    | 23/25 (92.0%)    | 11/13 (84.6%)     |     |
| Moderate hunger in the household               | 10/46 (21.7%)    | 6/28 (21.4%)     | 4/15 (26.7%)      |       | 5/41 (12.2%)     | 4/26 (15.4%)     | 1/13 (7.7%)       |     | 4/40 (10.0%)     | 2/25 (8.0%)      | 2/13 (15.4%)      |     |
| Severe hunger in the household                 | 1/46 (2.2%)      | 1/28 (3.6%)      | 0                 |       | 0                | 0                | 0                 |     | 0                | 0                | 0                 |     |

**Table S2. Maternal diet and food security indexes during follow-up (continuation)**

| Maternal diet (food-consumption questionnaire) | 18 weeks      | non-undernourished women | undernourished women | <i>P</i> value of the difference | 25 weeks       | non-undernourished women | undernourished women | <i>P</i> value of the difference | <i>P</i> value of the difference between non-undernourished and undernourished during the entire follow-up* | <i>P</i> value of the differences in food consumption during the entire follow-up* |
|------------------------------------------------|---------------|--------------------------|----------------------|----------------------------------|----------------|--------------------------|----------------------|----------------------------------|-------------------------------------------------------------------------------------------------------------|------------------------------------------------------------------------------------|
| Grains, white roots and tubers                 | 28/29 (96.6%) | 14/15 (93.3%)            | 12/12 (100.0%)       | 0.9                              | 34/34 (100.0%) | 20/20 (100.0%)           | 12/12 (100.0%)       | 0.9                              | 0.9                                                                                                         | 0.2                                                                                |
| Pulses: beans, peas and lentils                | 2/29 (6.9%)   | 0/15 (0.0%)              | 2/12 (16.7%)         | 0.2                              | 2/34 (5.9%)    | 1/20 (5.0%)              | 1/12 (8.3%)          | 0.9                              | 0.7                                                                                                         | 0.4                                                                                |
| Nuts and seeds                                 | 25/29 (86.2%) | 13/15 (86.7%)            | 10/12 (83.3%)        | 0.9                              | 26/34 (76.5%)  | 14/20 (70.0%)            | 10/12 (83.3%)        | 0.7                              | 0.3                                                                                                         | 0.01                                                                               |

|                                                   |                 |                 |                 |              |                 |                 |                  |              |                  |                  |
|---------------------------------------------------|-----------------|-----------------|-----------------|--------------|-----------------|-----------------|------------------|--------------|------------------|------------------|
| Milk and milk products                            | 9/29 (31.0%)    | 5/15 (33.3%)    | 3/12 (25.0%)    | 0.7          | 15/34 (44.1%)   | 10/20 (50.0%)   | 4/12 (33.3%)     | 0.5          | 0.1              | 0.5              |
| Meat, poultry, and fish                           | 20/29 (69.0%)   | 9/15 (60.0%)    | 9/12 (75.0%)    | 0.7          | 27/34 (79.4%)   | 16/20 (80.0%)   | 9/12 (75.0%)     | 0.9          | 0.8              | 0.5              |
| Eggs                                              | 2/29 (6.9%)     | 0/15 (0.0%)     | 2/12 (16.7%)    | 0.2          | 1/34 (2.9%)     | 1/20 (5.0%)     | 0/12 (0.0%)      | 0.9          | 0.1              | 0.8              |
| Dark green leafy vegetables                       | 20/29 (69.0%)   | 9/15 (60.0%)    | 9/12 (75.0%)    | 0.7          | 26/34 (76.5%)   | 14/20 (70.0%)   | 10/12 (83.3%)    | 0.7          | <b>0.01</b>      | <b>&lt;0.001</b> |
| Other vitamin A rich fruits<br>and vegetables     | 8/29 (27.6%)    | 1/15 (6.7%)     | 7/12 (58.3%)    | <b>0.008</b> | 15/34 (44.1%)   | 7/20 (35.0%)    | 8/12 (66.7%)     | 0.1          | 0.1              | 0.6              |
| Other vegetables                                  | 27/29 (93.1%)   | 14/15 (93.3%)   | 11/12 (91.7%)   | 0.9          | 33/34 (97.1%)   | 20/20 (100.0%)  | 11/12 (91.7%)    | 0.4          | 0.8              | <b>0.005</b>     |
| Other fruits                                      | 3/29 (10.34%)   | 1/15 (6.7%)     | 2/12 (16.7%)    | 0.6          | 0               | 0/20 (0.0%)     | 0/12 (0.0%)      | 0.9          | 0.2              | 0.1              |
| Insects, small rodents and<br>other small animals | 6/29 (20.69%)   | 5/15 (33.3%)    | 1/12 (8.3%)     | 0.2          | 3/34 (8.8%)     | 3/20 (15.0%)    | 0/12 (0.0%)      | 0.3          | 0.1              | 0.3              |
| Red palm oil                                      | 7/29 (24.14%)   | 1/15 (6.7%)     | 6/12 (50.0%)    | <b>0.02</b>  | 9/34 (26.5%)    | 4/20 (20.0%)    | 5/12 (41.7%)     | 0.2          | 0.1              | 0.9              |
|                                                   | 26/29 (89.7%)   | 14/15 (93.3%)   | 10/12 (83.3%)   | 0.6          | 33/34 (97.1%)   | 20/20 (100.0%)  | 11/12 (91.7%)    | 0.4          | 0.6              | 0.1              |
| Other oils and fats                               |                 |                 |                 |              |                 |                 |                  |              |                  |                  |
| Condiments and seasonings                         | 24/29 (82.8%)   | 11/15 (73.3%)   | 11/12 (91.7%)   | 0.3          | 27/34 (79.4%)   | 17/20 (85.0%)   | 8/12 (66.7%)     | 0.4          | 0.4              | 0.7              |
| Other beverages and foods                         | 16/29 (55.2%)   | 4/15 (26.7%)    | 11/12 (91.7%)   | <b>0.001</b> | 17/34 (50.0%)   | 6/20 (30.0%)    | 10/12 (83.3%)    | <b>0.009</b> | <b>&lt;0.001</b> | 0.3              |
| Sweet foods                                       | 24/29 (82.8%)   | 12/15 (80.00%)  | 10/12 (83.3%)   | 0.9          | 31/34 (91.2%)   | 18/20 (90.0%)   | 11/12 (91.7%)    | 0.9          | 0.048            | 0.3              |
| Sweet beverages                                   | 0               | 0/15 (0.0%)     | 0/12 (0.0%)     | 0.9          | 0               | 0/20 (0.0%)     | 0/12 (0.0%)      | 0.9          | 0.9              | 0.5              |
| Woman's dietary diversity<br>score (WDDS)         | 5.0 (4.0 ; 6.0) | 4.0 (4.0 ; 5.0) | 6.0 (4.0 ; 7.0) | 0.1          | 5.0 (5.0 ; 6.0) | 5.0 (4.0 ; 6.0) | 5.00 (5.0 ; 6.0) | 0.5          | 0.1              | <b>0.002</b>     |
| WDDS categories                                   |                 |                 |                 | 0.3          |                 |                 |                  | 0.2          | 0.1              | <b>0.01</b>      |
| Low diverse diet (WDD < 5)                        | 13/29 (44.8%)   | 9/15 (60.0%)    | 4/12 (33.3%)    |              | 8/34 (23.5%)    | 7/20 (35.0%)    | 1/12 (8.3%)      |              |                  |                  |
| Diverse diet (WDD ≥ 5)                            | 16/29 (55.2%)   | 6/15 (40.0%)    | 8/12 (66.7%)    |              | 26/34 (76.5%)   | 13/20 (65.0%)   | 11/12 (91.7%)    |              |                  |                  |
| <b>Maternal diet (24-h recall)</b>                |                 |                 |                 |              |                 |                 |                  |              |                  |                  |
| Grains, white roots and tu-<br>bers               | 23/23 (100.0%)  | 11/11 (100.0%)  | 11/11 (100.0%)  | 0.9          | 22/22 (100.0%)  | 14/14 (100.0%)  | 7/7 (100.0%)     | 0.9          | 0.9              | 0.9              |



[illegible]

|                                                |                   |                  |                   |     |                  |                   |                   |     |     |     |
|------------------------------------------------|-------------------|------------------|-------------------|-----|------------------|-------------------|-------------------|-----|-----|-----|
| Household Food Insecurity Access Scale (HFIAS) | 10.0 (6.0 ; 12.0) | 8.0 (6.0 ; 12.0) | 10.0 (7.0 ; 14.5) | 0.4 | 8.0 (5.0 ; 12.0) | 8.00 (5.0 ; 13.0) | 8.50 (4.0 ; 11.5) | 0.6 | 0.1 | 0.2 |
| Categories of HFIAS                            |                   |                  |                   | 0.8 |                  |                   |                   | 0.6 | 0.9 | 0.9 |
| Food secure                                    | 0                 | 0                | 0                 |     | 1/33 (3.0%)      | 0                 | 1/12 (8.3%)       |     |     |     |
| Mildly food insecure                           | 1/28 (3.6%)       | 0                | 1/12 (8.3%)       |     | 1/33 (3.0%)      | 1/19 (5.3%)       | 0                 |     |     |     |
| Moderately food insecure                       | 15/28 (53.6%)     | 8/14 (57.1%)     | 6/12 (50.0%)      |     | 15/33 (45.5%)    | 8/19 (42.1%)      | 6/12 (50.0%)      |     |     |     |
| Severely food insecure                         | 12/28 (42.9%)     | 6/14 (42.9%)     | 5/12 (41.7%)      |     | 16/33 (48.5%)    | 10/19 (52.6%)     | 5/12 (41.7%)      |     |     |     |
| Household hunger scale index (HHS)             | 0.0 (0.0 ; 1.0)   | 0.00 (0.0 ; 1.0) | 0.0 (0.0 ; 1.0)   | 0.9 | 0.0 (0.0 ; 1.0)  | 0.0 (0.0 ; 1.0)   | 0.0 (0.0 ; 0.5)   | 0.3 | 0.6 | 0.2 |
| Categores of HHS                               |                   |                  |                   | 0.9 |                  |                   |                   | 0.7 | 0.7 | 0.1 |
| Little to no hunger in the household           | 27/29 (93.1%)     | 14/15 (93.3%)    | 11/12 (91.7%)     |     | 28/33 (84.9%)    | 17/19 (89.5%)     | 10/12 (83.3%)     |     |     |     |
| Moderate hunger in the household               | 2/29 (6.9%)       | 1/15 (6.7%)      | 1/12 (8.3%)       |     | 4/33 (12.1%)     | 1/19 (5.3%)       | 2/12 (16.7%)      |     |     |     |
| Severe hunger in the household                 | 0                 | 0                | 0                 |     | 1/33 (3.0%)      | 1/19 (5.3%)       | 0                 |     |     |     |

**Figure S1.** Distribution of maternal diet during follow-up

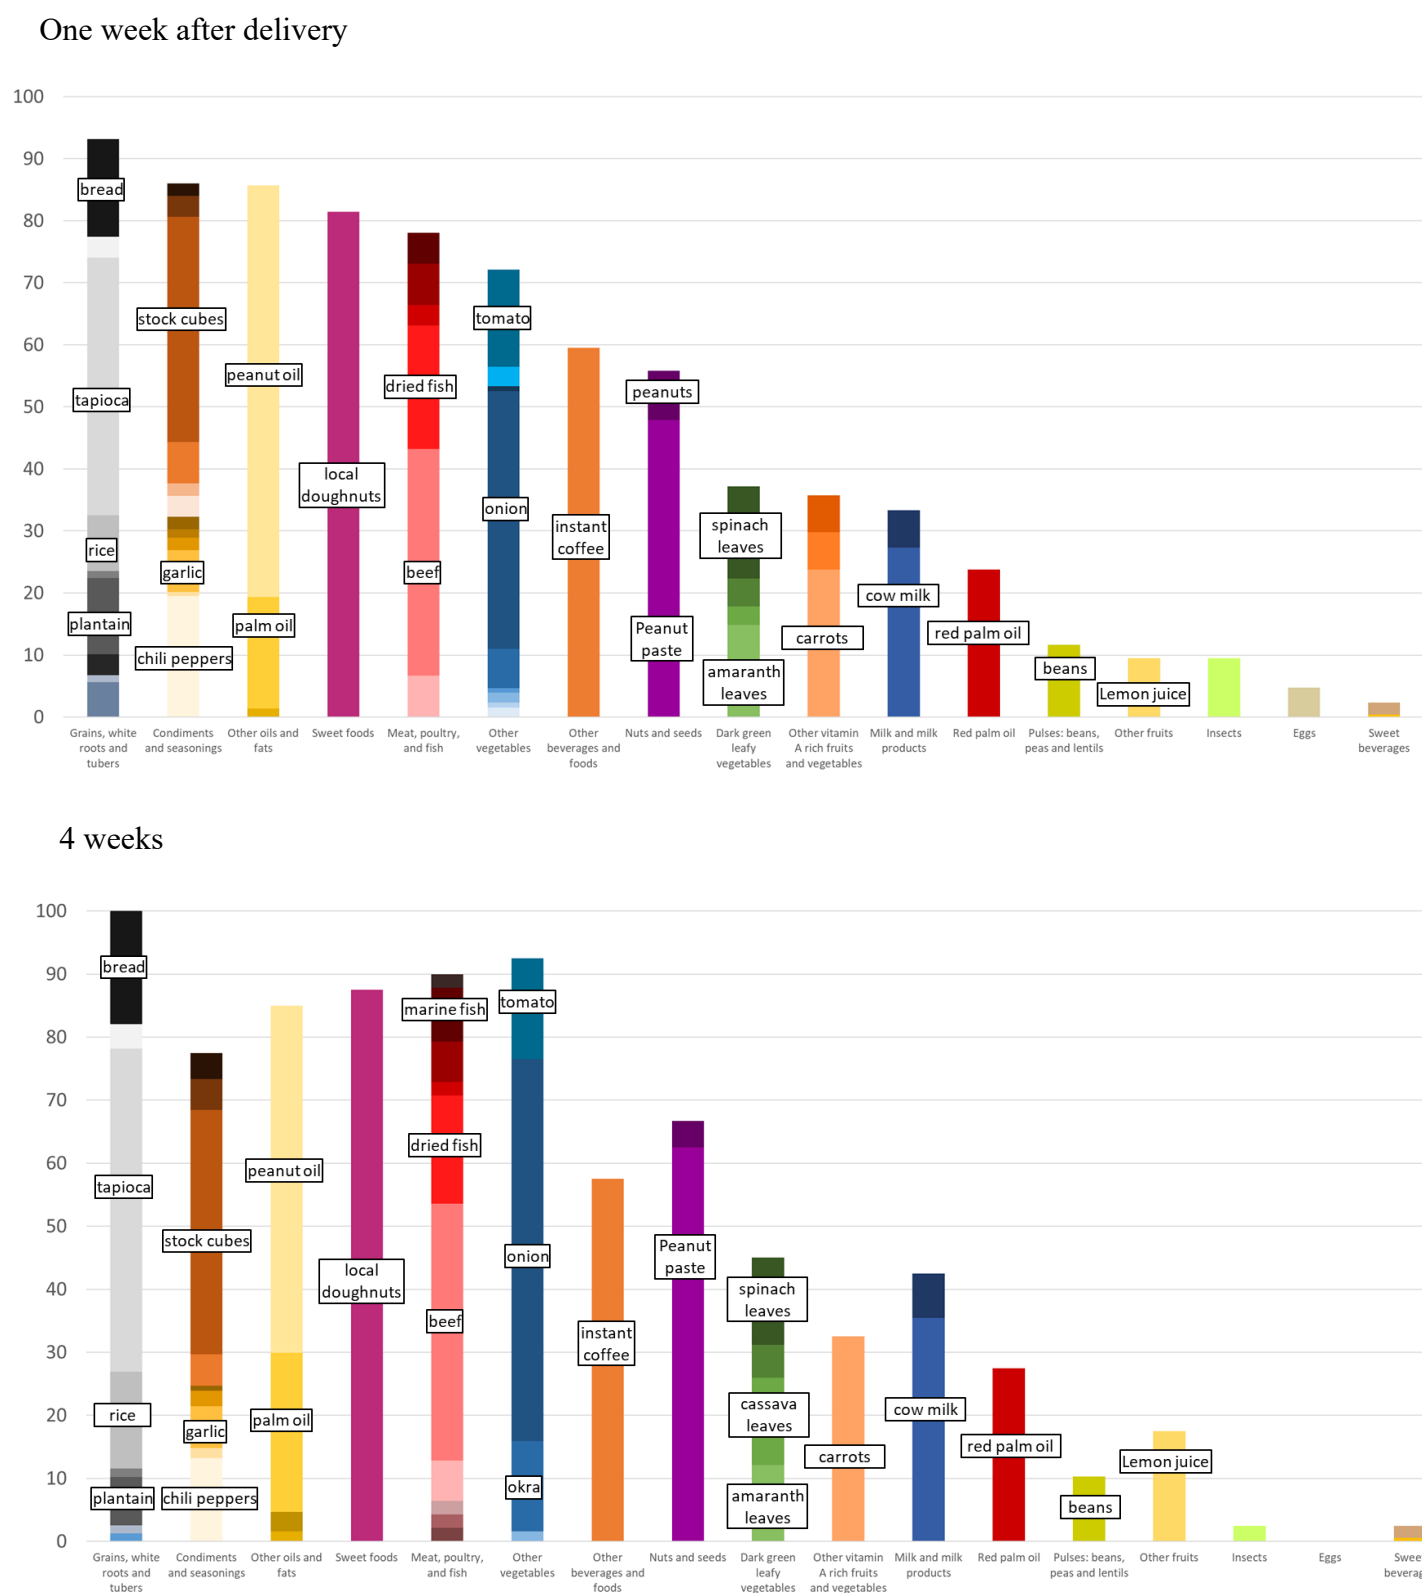

11 weeks

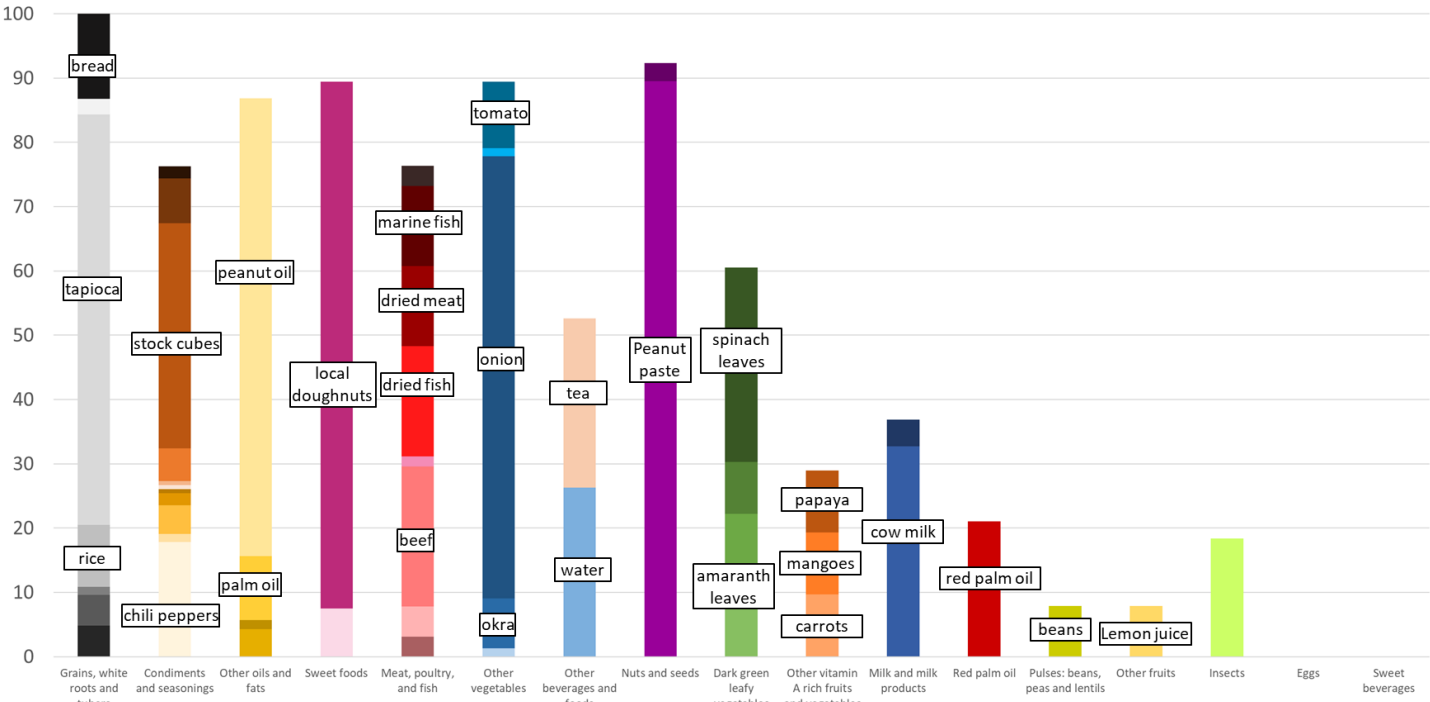

18 weeks

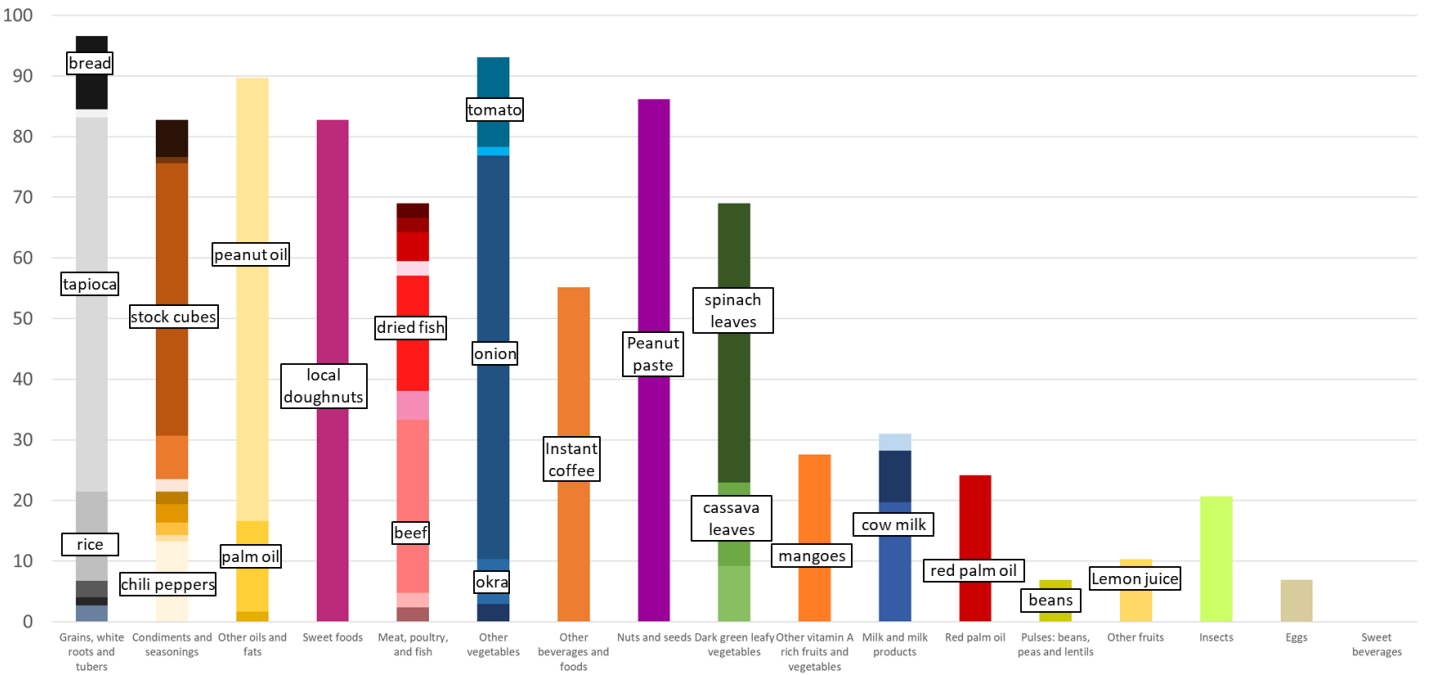

25 weeks

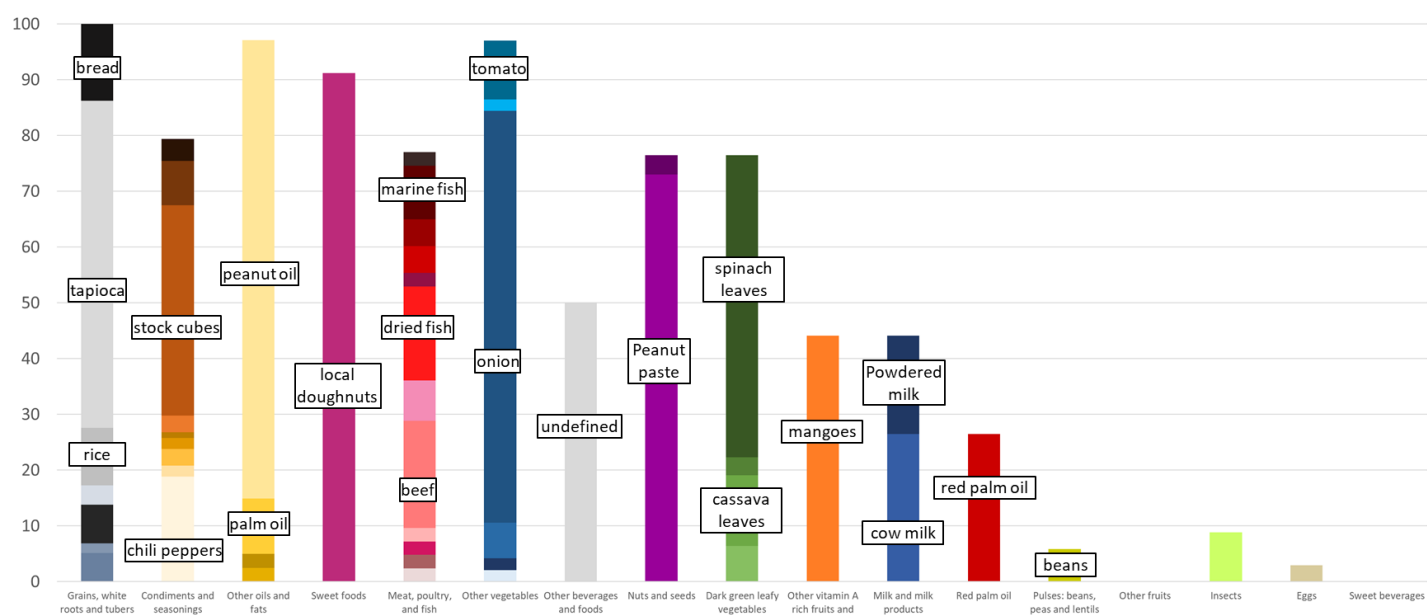

#### Grains, white roots and tubers

- wheat bread and rolls
- taro
- tapioca
- rice
- potatoes
- soya flour or protein
- plantain
- pasta
- maize grains
- maize flour
- gluten free bread
- cassava roots

#### Condiments and seasonings

- vegetable savoury extracts
- tomato paste
- stock cubes
- salt
- preparations for raising
- powdered extract of plant origin
- parsley
- lemongrass
- juice, lemon
- garlic
- fruit/vegetable juices and nectars
- chili peppers

#### Other oils and fats

- peanut oil
- palm oil
- mayonnaise
- butter

#### Sweet foods

- doughnuts-berliner
- chocolate

#### Meat, poultry, and fish

- smoked fish
- marine fish
- dried meat
- freshwater fish
- pig
- dried fish
- mammals or birds meat
- cow, ox or bull
- canned sardines
- dried shrimps or prawns
- chicken
- rabbit
- bovine other slaughtering products
- liver
- goat

#### Other vegetables

- tomato
- summer squashes
- spring onions
- onions
- okra
- fungi
- head cabbages and similar
- green beans
- eggplant
- courgettes

#### Other beverages and foods

- instant coffee
- fermented tea infusion
- drinking water
- undefined

#### Nuts and seeds

- peanuts
- peanut butter

#### Dark green leafy vegetables

- spinaches and similar
- pumpkin leaves
- cassava leaves
- amaranth leaves

#### Other vitamin A rich fruits and vegetables

- pumpkins
- papaya
- mangoes
- carrots

#### Milk and milk products

- yogurt
- milk powder
- cow milk

#### Red palm oil

- red palm oil

#### Pulses

- beans

#### Other fruits

- lemon juice

#### Insects

- edible insects

#### Eggs

- eggs

#### Sweet beverages

- instant coffee
- fermented tea infusion

Y axis represents the % of women who consumed this food category at this specific time point out of all the women included in the study. Within each category, the relative importance of each food was calculated using the 24h-recall questionnaires.
